# Supplementary material for: Highly efficient peroxidase-like activity of a metal–oxide-incorporated CeO2–MIL(Fe) metal–organic framework and its application in the colorimetric detection of melamine and mercury ions via induced hydrogen and covalent bonds
Source: Royal Society of Chemistry journal article supplement (doi:10.1039/d2an00864e), 2022-01-01
Supplement: d2an00864e1.pdf [file d2an00864e1.pdf]

## SUPPORTING INFORMATION

### Highly Efficient Peroxidase-like Activity of Metal Oxide Incorporated Metal Organic Framework CeO<sub>2</sub>-MIL(Fe) and its application for Colorimetric Detection of Melamine and Mercury ions via Induced Hydrogen and Covalent Bond

Arunjegan Amalraj, Mariyammal Narayanan and Panneerselvam Perumal\*

Department of Chemistry, SRM Institute of Science and Technology, Kattankulathur, 603 203,  
Tamil Nadu, India.

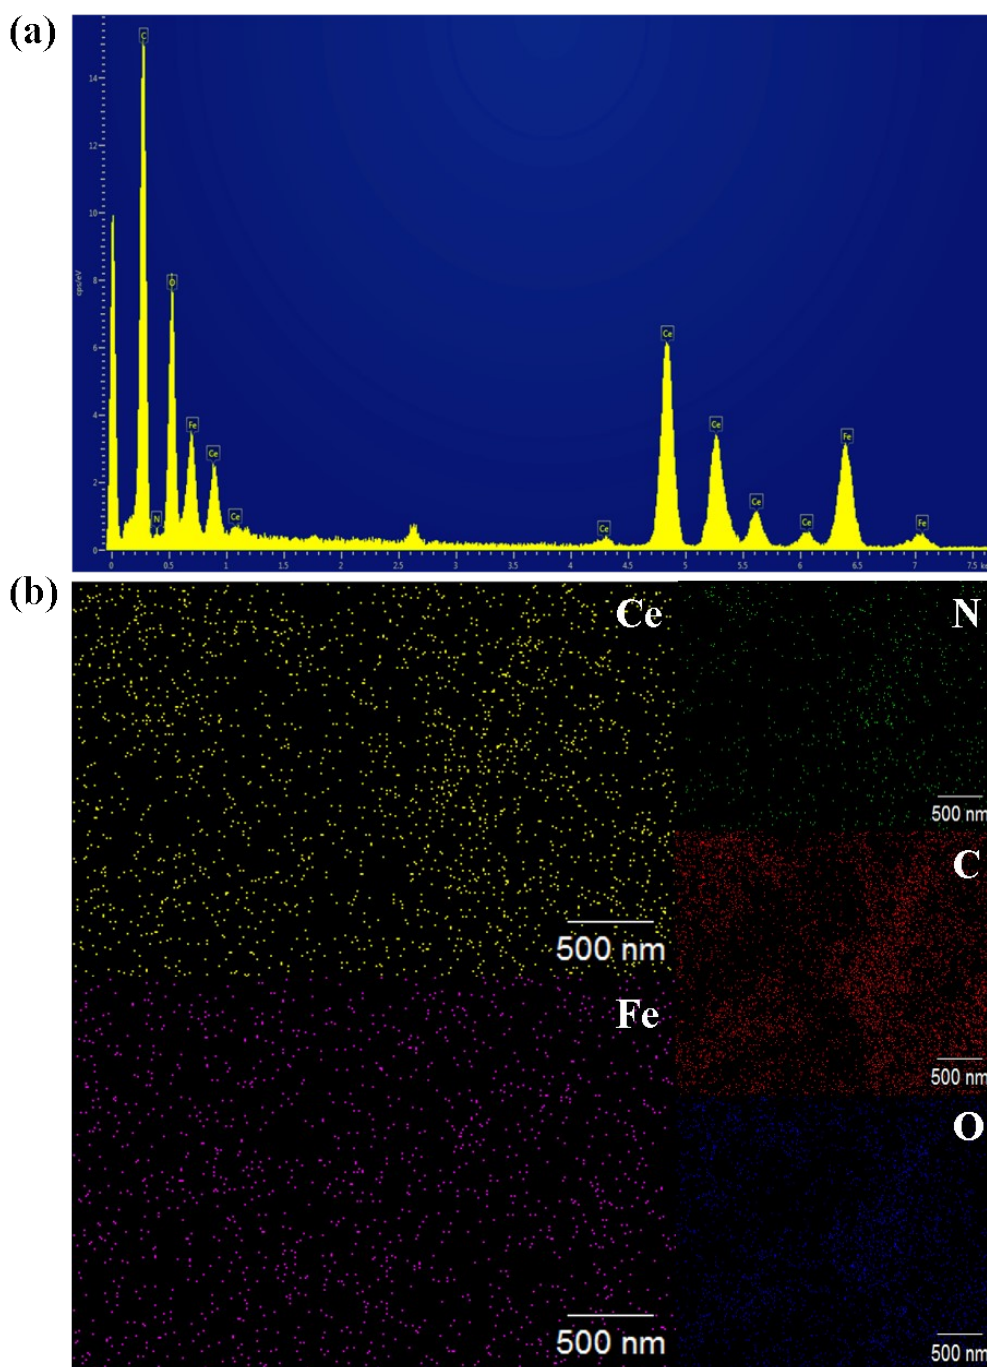

**Figure S1.** (a) EDXS and (b) elemental mapping for CeO<sub>2</sub>-MIL(Fe)

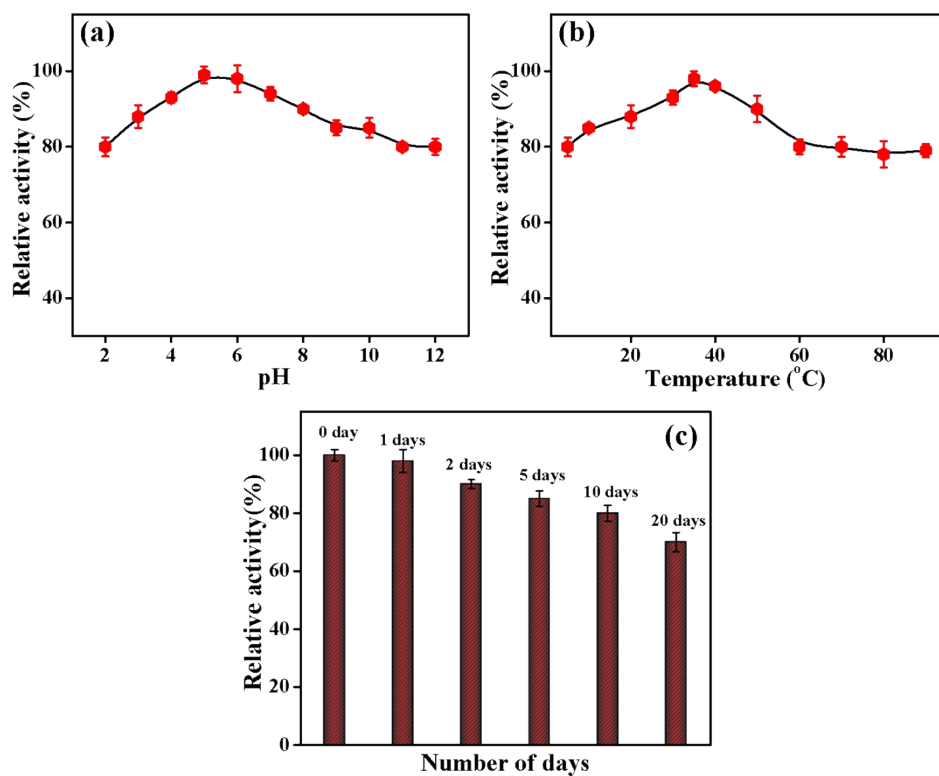

**Figure S2.** Stability analysis of CeO<sub>2</sub>-MIL(Fe) in different (a) pH and (b) temperature, (c) stability test for sensor probe at various days.

**Table S1.** Comparison between proposed sensors with earlier reported sensors

| Bio-chemical platform                                                 | Sensor       | LOD ( nM) | Targets          | Ref.      |
|-----------------------------------------------------------------------|--------------|-----------|------------------|-----------|
| Cu <sup>2+</sup> -H <sub>2</sub> O <sub>2</sub> -TMB                  | Colorimetry  | 500       | melamine         | [1]       |
| Zr-MOF@Ru                                                             | Colorimetry  | 90        | melamine         | [2]       |
| Au-nanocluster                                                        | Colorimetry  | 72        | melamine         | [3]       |
| AuNps-Aptamer                                                         | Colorimetry  | 14.9      | melamine         | [4]       |
| TMB+H <sub>2</sub> O <sub>2</sub> +CeO <sub>2</sub> -MIL(Fe)          | Colorimetry  | 8         | melamine         | This work |
| 4DBS                                                                  | Colorimetry  | 451       | Hg <sup>2+</sup> | [5]       |
| AuNps-DNA                                                             | Fluorescence | 60        | Hg <sup>2+</sup> | [6]       |
| H <sub>2</sub> TCPP/ZnS/CoS                                           | Colorimetry  | 17.4      | Hg <sup>2+</sup> | [7]       |
| MoS <sub>2</sub> -Au composite                                        | Colorimetry  | 5         | Hg <sup>2+</sup> | [8]       |
| TMB+H <sub>2</sub> O <sub>2</sub> +CeO <sub>2</sub> -MIL(Fe)+melamine | Colorimetry  | 2         | Hg <sup>2+</sup> | This work |

**REFERENCE**

- (1) X. Han, Z. Qin, M. Zhao, J. Song, F. Qu, F. Qu and R. M. Kong, *RSC Adv.*, 2018, **8**, 34877–34882.
- (2) C. Lin, C. Zhong, Y. Song and L. Wang, *Microchem. J.*, 2021, **162**, 105837.
- (3) G. X. Cao, X. M. Wu, Y. M. Dong, Z. J. Li and G. L. Wang, *Microchim. Acta*, 2016, **183**, 441–448.
- (4) X. Hu, K. Chang, S. Wang, X. Sun, J. Hu and M. Jiang, *PLoS One*, 2018, **13**, 1–15.
- (5) P. Ravichandiran, V. K. Kaliannagounder, N. Maroli, A. Boguszewska-Czubara, M. Maslyk, A. R. Kim, B. H. Park, M. K. Han, C. S. Kim, C. H. Park and D. J. Yoo, *Spectrochim. Acta - Part A Mol. Biomol. Spectrosc.*, 2021, **257**, 119776.

- (6) Y. Liu, Q. Ouyang, H. Li, M. Chen, Z. Zhang and Q. Chen, *J. Agric. Food Chem.*, 2018, **66**, 6188–6195.
- (7) N. Li, Y. He, J. Lian, Q. Y. Liu, Y. X. Zhang and X. Zhang, *Inorg. Chem.*, 2020, **59**, 18384–18395.
- (8) C. Ma, Y. Ma, Y. Sun, Y. Lu, E. Tian, J. Lan, J. Li, W. Ye and H. Zhang, *J. Colloid Interface Sci.*, 2019, **537**, 554–561.
